# Supplementary material
Source: HighWire-hosted journal article supplement (https://jnm.snmjournals.org/highwire/filestream/94813/field_highwire_adjunct_files/0/157677_Supplemental_Data.pdf)
Supplement: 157677_Supplemental_Data.pdf [file 157677_Supplemental_Data.pdf]

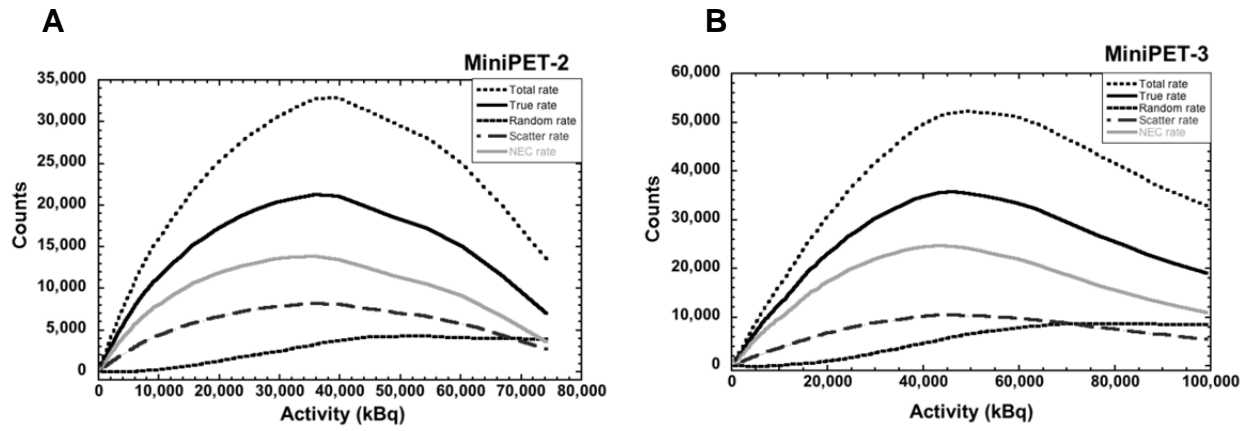

**SUPPLEMENTAL FIGURE 1.** Counting rate performance measured with the NEMA NU 4 rat phantom for the MiniPET-2 (A) and MiniPET-3 (B).
